# Cardiac hybrid imaging

Oliver Gaemperli<sup>1\*</sup>, Antti Saraste<sup>2,3</sup>, and Juhani Knuuti<sup>2</sup>

<sup>1</sup>Cardiac Imaging, University Hospital Zurich, Ramistrasse 100, CH-8091 Zurich, Switzerland; and <sup>2</sup>Turku PET Centre University of Turku, Turku, Finland; and <sup>3</sup>Department of Medicine, Turku University Hospital, Turku, Finland

Received 19 October 2011; accepted after revision 20 October 2011; online publish-ahead-of-print 17 November 2011

Cardiac hybrid imaging combines different imaging modalities in a way where both modalities equally contribute to image information. The most common and best-studied approach is to combine computed tomography coronary angiography (CTCA) and myocardial perfusion imaging either with single-photon emission computed tomography or with positron emission tomography (PET). This combination is a promising tool for evaluation of coronary artery disease since it allows visualization of coronary atherosclerotic lesions and their haemodynamic consequences in a single study and it appears to offer superior diagnostic accuracy when compared with stand-alone imaging. More recent applications are a combination of CTCA and cardiac magnetic resonance imaging by using software image fusion and utilization of commercially available hybrid PET/MRI scanners for cardiac applications. Currently, these methods have been reported only as case reports, but several potential applications also in cardiology can be anticipated. The development of new molecular imaging probes will also open completely new possibilities for guidance and monitoring of advanced therapies. This review will focus on the concepts and currently available clinical experiences from cardiac hybrid imaging as well as discuss the potential future applications.

## Keywords

Hybrid imaging • Coronary artery disease • PET • MRI • SPECT

## Background

A number of landmark studies using intraoperative Doppler ultrasound, positron emission tomography (PET), or fractional flow reserve (FFR) have consistently demonstrated that the angiographic severity of coronary lesions is a poor predictor of its haemodynamic relevance.<sup>1–4</sup> Similarly, comparative studies of computed tomography coronary angiography (CTCA) and myocardial perfusion imaging (MPI) show that only 30–50% of stenoses with more than 50% luminal narrowing are associated with reversible perfusion defects on MPI, and conversely, many patients with completely normal myocardial perfusion may harbour subclinical coronary artery disease (CAD).<sup>5–8</sup>

Large randomized clinical trials have failed to demonstrate superiority of revascularization over modern medical treatment in terms of long-term cardiovascular events if patients are not stratified by prior ischaemia testing.<sup>9,10</sup> In the presence of significant myocardial ischaemia, however, revascularization seems to improve the outcome by reducing the ischaemic burden on the left ventricular myocardium.<sup>11,12</sup> The pivotal role of ischaemia-targeted revascularization in stable CAD patients has further been highlighted in the randomized FAME trial.<sup>13,14</sup> Consequently, the role of testing for

myocardial ischaemia has been incorporated in revascularization guidelines.<sup>15</sup> These data emphasize the importance of interrogating both morphology and function in patients with stable CAD in order to offer the most appropriate treatment strategy.

The tremendous developments in non-invasive imaging technology over the last decades coupled with improved and faster dedicated software products for image processing and analysis have facilitated the rapid clinical introduction of cardiac hybrid imaging.<sup>16</sup> A great leap forward came with the introduction of high-end multidetector CT scanners with the ability to depict the small coronary arteries with a resolution and accuracy that was robust enough for clinical practice. Additionally, cardiac hybrid imaging was spurred by the tremendous success of hybrid whole-body PET/CT in oncology which allowed for the first time to merge high-resolution anatomy with a functional tumour-seeking agent. Initially, thoracic CT data were used only for attenuation correction of MPI images,<sup>17</sup> and several technical issues had to be resolved prior to wide clinical dissemination: spatial shifts and intrinsic mismatch between the electrocardiogram-gated CTCA and non-gated perfusion study had to be compensated. In addition, the correlation of the perfusion information with the coronary anatomy could not be properly appreciated on a

\* Corresponding author. Tel: +41 44 255 35 55; fax: +41 44 255 44 14, Email: oliver.gaemperli@usz.ch

Published on behalf of the European Society of Cardiology. All rights reserved. © The Author 2011. For permissions please email: journals.permissions@oup.com

slice-by-slice display. Thus, three-dimensional (3D) volume-rendering techniques are crucial to exploit the full potential of the technique.<sup>18</sup>

The historical use of CTCA in combination with MPI has also generated confusion as to the exact definition of cardiac hybrid imaging. Some have referred to CT-based attenuation correction of MPI as hybrid imaging; others have called the mere side-by-side reading of CTCA and MPI 'hybrid imaging'. We refer to the term 'hybrid imaging' in a more stringent way as the combined or fused imaging of two data sets where both modalities equally contribute to image information.<sup>19</sup> Thus, neither CT-based attenuation correction nor mental integration of side-by-side modalities are considered or discussed in this manuscript.

## Strengths and weaknesses of separate techniques

### Computed tomography coronary angiography

Computed tomography coronary angiography has become an established non-invasive method for anatomic detection of coronary atherosclerotic plaques and luminal stenosis. The current multislice devices coupled with up-to-date acquisition protocols allow robust and reproducible assessment of coronary atherosclerosis with high temporal and spatial resolution as well as acceptable radiation dose.<sup>20</sup> Multiple single-centre studies<sup>20</sup> as well as multi-centre studies<sup>21–23</sup> have demonstrated the high diagnostic accuracy of CTCA for the identification of >50% coronary artery stenosis and very low rates of non-evaluable scans. In the ACCURACY trial, 230 patients underwent CTCA and invasive coronary angiography (ICA). On a patient-based analysis, the sensitivity, specificity, positive predictive value (PPV), and negative predictive value (NPV) were 95, 83, 64, and 99%, respectively, to detect  $\geq$ 50% stenosis.<sup>23</sup> With the exception of the CORE 64 trial, the studies have consistently shown that CTCA has a particularly high NPV close to 100% that makes CTCA an excellent tool for exclusion of CAD in patients with low-to-intermediate pre-test likelihood of disease.<sup>15</sup>

Computed tomography coronary angiography has only limited capability to assess comprehensively the severity of coronary artery stenosis. As previously explained, the angiographic severity of coronary lesions is a poor predictor of its haemodynamic relevance and only a proportion of stenoses in CTCA are associated with myocardial ischaemia. There is a tendency to overestimate the degree of stenosis, especially in the presence of dense calcified plaques (blooming artefact) resulting in lower PPV.<sup>20</sup> Furthermore, evaluation of stenosis in vessels with small diameter and in the presence of image artefacts caused by irregular or fast heart rate is challenging.<sup>20</sup> Thus, a combination of CTA with functional assessment would be important for evaluation of intermediate stenoses to identify those patients who may benefit from revascularization.

### Cardiac magnetic resonance

Cardiac magnetic resonance (CMR) has become an important tool for investigating the morphology and function of the cardiovascular

system.<sup>24</sup> CMR can provide high-resolution images of the myocardium with high blood-to-tissue contrast that enables accurate measurement of ventricular volumes without need for using geometrical models. Detection of CAD by CMR is based on either evaluation of reversible wall motion abnormalities during dobutamine stress, but more recently also on visualization of myocardial perfusion by T1-weighted imaging after gadolinium contrast injection. A unique feature offered by CMR is the visualization of myocardial tissue abnormalities, particularly necrosis or scar, using the late gadolinium enhancement imaging technique.<sup>24,25</sup> Routine coronary angiography is not feasible with the current CMR techniques.

Combining CMR with PET or CT is potentially desirable for many reasons, including lack of additional ionizing radiation, good tissue characterization properties of CMR, possibility to detect myocardial infarct scar with CMR in parallel to viable tissue with fluorodeoxyglucose PET, and possibility to do simultaneous (isochronic) acquisition with CMR and PET. Hybrid scanners containing CMR and PET have been available for short period of time and there are still technical issues to be resolved before their potential in cardiac applications can be fully explored.<sup>26,27</sup>

### Myocardial perfusion single-photon emission computed tomography and positron emission tomography

Myocardial perfusion single-photon emission computed tomography (SPECT) is a widely available and extensively validated non-invasive method for the detection of myocardial ischaemia. SPECT perfusion scintigraphy is performed to produce images of regional tracer uptake that reflect relative regional myocardial blood flow. Without correction for referral bias, the reported sensitivity of exercise SPECT for the detection of angiographically significant CAD is high (87–89%).<sup>28,29</sup> The normalcy rate corrects for referral bias that has impact on specificity, and it is estimated at 89%.<sup>29</sup> In addition to detection, myocardial perfusion SPECT can also reveal the extent of ischaemic myocardium and viability. Normal perfusion SPECT in patients with intermediate-to-high likelihood of CAD predicts a very low rate of cardiac death or non-fatal myocardial infarction (MI) ( $\leq$ 1%/year).<sup>30</sup> Moreover, it has been shown that patients with less reversible ischaemia on SPECT have a survival advantage with medical therapy rather than revascularization, while those with more severe ischaemia are more likely to benefit from invasive procedures.<sup>11,12</sup> These features make myocardial perfusion scintigraphy a strong technique to guide selection of candidates for cardiac catheterization and possible revascularization.

Compared with SPECT, PET MPI offers certain advantages. PET can measure myocardial radioactivity concentrations with better spatial and contrast resolutions and it has accurate, well-validated attenuation correction. As a result, image artefacts caused by soft tissue attenuation are rare and perfusion images of the myocardium are of high quality. A large number of studies have shown that PET is an accurate method for detecting obstructive coronary artery disease (sensitivity and specificity  $\geq$ 90%).<sup>31</sup> A unique feature of PET is that myocardial blood flow can be quantified in mL/min/g at rest and during pharmacologically induced hyperaemia.<sup>31–34</sup> The clinical benefits of measuring myocardial

perfusion in absolute terms have been highlighted in a recent clinical study comparing the diagnostic accuracy of quantitative and relative analysis of  $^{15}\text{O}$ -water PET perfusion imaging in patients with suspected CAD<sup>35</sup> as well as in earlier studies.<sup>36,37</sup> The studies have shown that quantitative analysis of myocardial blood flow by PET improves the diagnostic accuracy of detecting CAD and is particularly helpful for revealing the true extent of CAD in patients with multivessel disease and for detection of balanced multivessel disease.<sup>35–37</sup>

Diagnostic problems for MPI techniques are presented by increasing number of patients who are presenting with obesity as well as extensive, multivessel CAD or endothelial dysfunction.<sup>31,32</sup> Particularly, in obese subjects, SPECT is prone to false-positive results due to non-uniform photon attenuation. In patients with multivessel CAD, SPECT underestimates the true extent of disease, since the technique emphasizes the territory supplied by the most severe stenosis.<sup>31,32</sup> Balanced reduction in myocardial hyperaemic blood flow is probably rather rare but it may explain the paradoxical underestimation of clinical risk in some high-risk cohorts with a normal or near-normal SPECT.<sup>31,32,35</sup> Although quantification of myocardial blood flow by PET can partly overcome these problems, differentiation of microvascular dysfunction from epicardial stenosis as a cause of abnormally low perfusion as well as assignment of perfusion defects to certain coronary lesions remains a problem in the absence of information on individual coronary anatomy. Another limitation of myocardial perfusion SPECT or PET is that they reveal coronary lesions that induce perfusion defects, but do not exclude the presence of subclinical non-obstructive coronary atherosclerosis that is also of prognostic value.<sup>38</sup>

## Hybrid imaging: clinical data

Traditionally, integration of coronary morphology and functional information from imaging studies is performed by mental coregistration using standardized myocardial segmentation models which allocate each myocardial segment to one of the three main coronary arteries.<sup>39</sup> However, coronary artery anatomy varies considerably among individuals and may disagree with standardized vascular territories in up to 72% of patients referred to MPI.<sup>40</sup> This applies particularly to the inferior and inferolateral wall, which are traditionally those territories with the largest variability in coronary anatomy. Hence, the incremental value of hybrid cardiac imaging resides in the accurate spatial co-localization of myocardial perfusion defects and subtending coronary arteries (Figures 1 and 2).

The majority of clinical data on hybrid imaging has accrued from rather small diagnostic single-centre studies. One group of studies has compared the diagnostic accuracy of hybrid imaging with the single techniques (i.e. either CTCA alone or MPI alone) using invasive coronary angiography as the gold standard (Table 1), while another group of studies has focused on the incremental clinical value of hybrid imaging over the side-by-side analysis of CTCA and MPI (Table 2). The feasibility and clinical robustness of non-invasive hybrid imaging was first documented by Namdar *et al.*<sup>41</sup> in a clinical study involving fusion of  $^{13}\text{N}$ - $\text{NH}_3$  PET with four-slice CTCA in 25 patients with CAD. Using ICA combined with PET as the reference standard, the hybrid PET/CTCA approach allowed

to detect flow-limiting coronary lesions which required a revascularization procedure with a sensitivity, specificity, PPV, and NPV of 90, 98, 82, and 99%, respectively. These encouraging results were confirmed by a similar study with SPECT and CTCA, showing that the hybrid approach resulted in a significant improvement in specificity (from 63 to 95%) and PPV (from 31 to 77%) compared with CTA alone for detecting flow-limiting coronary stenoses.<sup>42</sup> A similar diagnostic performance was reported by Groves *et al.*<sup>43</sup> using a  $^{82}\text{Rb}$  PET/CT hybrid system. Sato *et al.*<sup>44</sup> showed that adding SPECT information in non-evaluable arteries on CTCA improved particularly specificity and PPV of the latter techniques significantly (from 80 to 92%, and from 69 to 85%, respectively). One of the largest, recently published studies included 107 patients undergoing hybrid  $^{15}\text{O}$ - $\text{H}_2\text{O}$  PET/64-slice CTCA.<sup>45</sup> In this study, haemodynamic significance of ICA stenoses was confirmed in 40 patients with FFR providing a more comprehensive gold standard. Consequently, the use of PET/CTCA increased the PPV significantly from 76 to 96% compared with CTCA alone. Despite these promising early results, it should be noted that the aforementioned studies included limited number of patients, a variety of hybrid systems were used, and no uniform gold standard was used. Thus, larger multicentric trials will be needed to confirm these early results.

While the latter reports document the high diagnostic accuracy of hybrid imaging, another set of studies documents that its clinical value is rather synergistic than just additive (Table 2). In an early report of 38 patients with perfusion defects on SPECT, the number of lesions with equivocal haemodynamic relevance was significantly reduced using SPECT/CTCA fusion compared with the side-by-side analysis.<sup>46</sup> Among these equivocal lesions, the hybrid approach confirmed haemodynamic significance in 35% and excluded it in 25%. This added important clinical information in 29% of all patients and was particularly useful in patients with multivessel disease and intermediate severity stenoses or in patients with diseased side branches. Santana *et al.*<sup>47</sup> demonstrated a significantly higher diagnostic performance of fused SPECT/CTCA imaging compared with SPECT alone ( $P < 0.001$ ) and to the side-by-side analysis of SPECT and CTCA ( $P = 0.007$ ). Interestingly, this improved diagnostic performance was mainly a result of a higher sensitivity in patients with multivessel disease. A recent study implementing motion-frozen SPECT data and CTA-guided SPECT contour and territory adjustments found that the improved diagnostic value of hybrid imaging was driven by higher accuracy in left circumflex coronary artery and right coronary artery territories.<sup>48</sup>

Hence, through spatial coregistration of anatomical and functional information, hybrid imaging may not only improve the diagnostic accuracy of non-invasive CAD assessment, but also provide vessel-specific functional information to allow targeted revascularization strategies.<sup>14</sup> The independent prognostic value of morphological and functional coronary information was demonstrated in a multicentre follow-up study in more than 500 patients supporting the notion that both parameters need to be investigated in patients with CAD.<sup>49</sup> Moreover, a recent prospective follow-up trial assessed the incremental prognostic value of hybrid imaging over the side-by-side findings from both techniques.<sup>50</sup> In this study, 324 consecutive patients undergoing hybrid SPECT/CTCA were

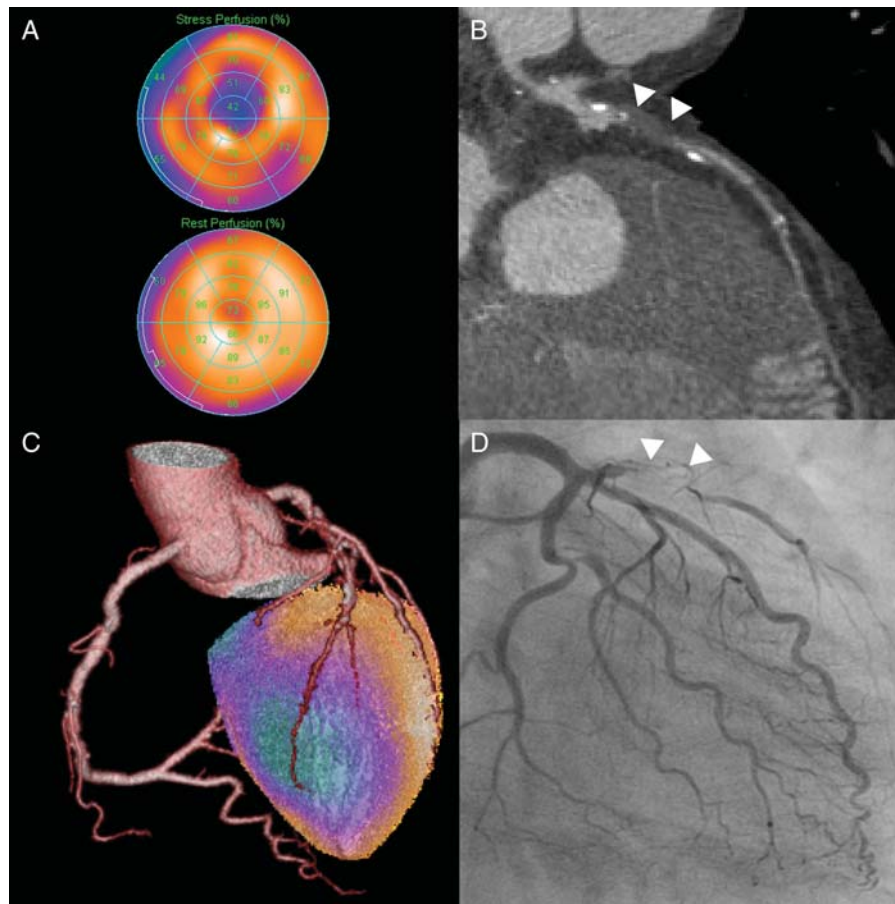

**Figure 1** Example of a 47-year-old patient with typical angina. His stress and rest myocardial perfusion single-photon emission computed tomography (A) show a reversible anteroapical perfusion defect. On computed tomography angiography, a complete occlusion of the proximal left anterior descending artery can be observed (arrowheads in B) with distal vessel opacification suggesting collateralization. The hybrid volume-rendered single-photon emission computed tomography/computed tomography images (C) demonstrate that the anteroapical ischaemic territory is supplied by the occluded left anterior descending artery. The invasive angiogram confirms the total occlusion of the proximal left anterior descending artery (D, arrowheads).

subdivided into three groups: (i) stenosis by CTCA and matching reversible SPECT defect (i.e. the perfusions defects were superimposed on the stenotic coronary artery on the hybrid 3D display); (ii) unmatched CTCA and SPECT findings; and (iii) normal finding by CTCA and SPECT. On follow-up (median 2.8 years), a corresponding matched hybrid finding was associated with a significantly higher event rate (death or MI) and proved to be an independent predictor for major adverse cardiac events. The annual death/MI rate was 6.0, 2.8, and 1.3% for patients with matched, unmatched, and normal findings (Figure 3). Revascularization rates within 60 days were 41, 11, and 0% for matched, unmatched, and normal findings, respectively ( $P < 0.001$ ), indicating that hybrid imaging findings had a significant impact on patient management.<sup>51</sup> However, larger prospective studies are needed to confirm these results and to assess whether changes in treatment based on hybrid imaging may have an impact on the patients' prognosis. Results of ongoing prospective multicentre trials such as SPARC, EVINCI, and PROMISE are therefore eagerly awaited and will

hopefully shed more light into the future of cardiac hybrid imaging.<sup>52,53</sup>

## Clinical implications: how to implement cardiac hybrid imaging into current algorithms

Currently, it remains unknown what kind of patients should undergo integrated examinations for clinical effectiveness and minimization of costs and radiation dose. There are several situations in which hybrid imaging can obviously provide clinically beneficial information. Patients with multivessel disease are most likely to benefit from hybrid imaging. For example, it is possible to localize the culprit flow-limiting lesion as shown in Figures 1 and 2. It can also be expected that the proportion of patients needing dual scanning depend on the characteristics of the patient population, especially the pre-test likelihood of CAD.



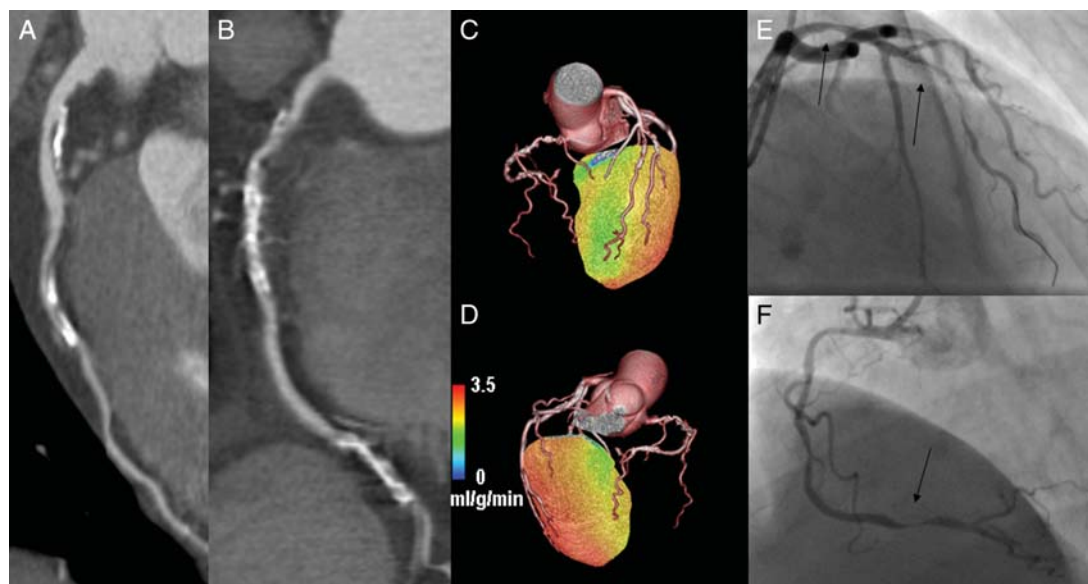

**Figure 2** Detection of culprit lesion by hybrid positron emission tomography/computed tomography angiography imaging in a patient with two-vessel coronary artery disease. A 49-year-old man with multiple risk factors of coronary artery disease (hypercholesterolaemia, hypertension, family history, and diabetes) and atypical chest pain. Exercise test was not feasible due to severe polyneuropathy. Multiplanar reconstructions of computed tomography angiography images of the left anterior descending coronary artery (A) and the right coronary artery (B) calcified atherosclerotic plaque and luminal narrowing in the proximal and mid-left anterior descending artery as well as in the proximal and distal right coronary artery. Hybrid volume-rendered images of computed tomography angiography and myocardial perfusion during adenosine stress as assessed by  $^{15}\text{O}$ -labelled water positron emission tomography show area of mildly reduced ( $2.0\text{--}2.5\text{ mL/g/min}$ ) perfusion as seen in green and yellow colours in the left anterior descending artery territory (C). Stress myocardial perfusion was moderately reduced ( $2.0\text{ mL/g/min}$ ) as seen in green colour in the area supplied by the right coronary artery (D). Perfusion is normal ( $>2.5\text{ mL/g/min}$ ) as seen in red colour in the area subtended by the left circumflex coronary artery that did not contain atherosclerosis (C and D). Consistent with the non-invasive findings, invasive coronary angiography showed significant stenosis in the distal left anterior descending artery (fractional flow reserve 0.54, E). After percutaneous coronary intervention of the distal stenosis, fractional flow reserve normalized being 0.85. Moreover, invasive angiography showed significant stenosis in the distal right coronary artery (fractional flow reserve 0.63, F) that was also treated by percutaneous coronary intervention.

**Table 1** Added diagnostic accuracy of cardiac hybrid imaging (single-photon emission computed tomography/computed tomography coronary angiography and positron emission tomography/computed tomography coronary angiography) (vessel-based analysis)

| Author                               | Hybrid system                                 | n   | Gold standard (definition of significant CAD)                           | Sens | Spec | PPV | NPV |
|--------------------------------------|-----------------------------------------------|-----|-------------------------------------------------------------------------|------|------|-----|-----|
| Namdar <i>et al.</i> <sup>41</sup>   | $^{13}\text{N-NH}_3$ PET/4-slice CTCA         | 25  | Flow-limiting coronary stenoses requiring revascularization (ICA + PET) | 90   | 98   | 82  | 99  |
| Rispler <i>et al.</i> <sup>42</sup>  | SPECT/16-slice CTCA                           | 56  | Flow-limiting coronary stenoses ( $>50\%$ stenosis on ICA + SPECT pos.) | 96   | 95   | 77  | 99  |
| Groves <i>et al.</i> <sup>43</sup>   | $^{82}\text{Rb}$ PET/64-slice CTCA            | 33  | $>50\%$ stenosis on ICA                                                 | 88   | 100  | 97  | 99  |
| Sato <i>et al.</i> <sup>44</sup>     | SPECT/64-slice CTCA <sup>a</sup>              | 130 | $>50\%$ stenosis on ICA                                                 | 94   | 92   | 85  | 97  |
| Kajander <i>et al.</i> <sup>45</sup> | $^{15}\text{O-H}_2\text{O}$ PET/64-slice CTCA | 107 | Flow-limiting coronary stenosis ( $>50\%$ stenosis of ICA + FFR)        | 93   | 99   | 96  | 99  |

n denotes the number of patients in each study. SPECT, single photon emission computed tomography; CTCA, CT coronary angiography; PET, positron emission tomography; CAD, coronary artery disease; Sens, sensitivity; Spec, specificity; PPV, positive predictive value; NPV, negative predictive value; ICA invasive coronary angiography; FFR, fractional flow reserve.

<sup>a</sup>Hybrid SPECT/CTCA only applied for non-evaluable arteries on CTCA (14%).

**Table 2** Synergistic clinical value of fused hybrid imaging compared with the side-by-side analysis

| Author                         | Hybrid system                                                 | Patient population                      | Incremental value of fused hybrid imaging                                                                                                              |
|--------------------------------|---------------------------------------------------------------|-----------------------------------------|--------------------------------------------------------------------------------------------------------------------------------------------------------|
| Gaemperli et al. <sup>46</sup> | SPECT/64-slice CTCA and 3D image fusion                       | 38 patients with $\geq 1$ SPECT defects | Modification of initial interpretation in 29% of patients<br>In equivocal lesions, hemodynamic relevance could be confirmed in 35% and excluded in 25% |
| Santana et al. <sup>47</sup>   | 16- and 64-slice CTCA and MPI (SPECT or <sup>82</sup> Rb PET) | 50 patients with suspected CAD          | Modification of initial interpretation in 28% of patients<br>Trend towards increased sensitivity (by 17%) in patients with multivessel disease         |
| Slomka et al. <sup>48</sup>    | Motion-frozen SPECT/64-slice CTCA (automatic coregistration)  | 35 patients with suspected CAD          | Improved diagnostic performance in RCA and LCX territories                                                                                             |

SPECT, single-photon emission computed tomography; CTCA, CT coronary angiography; MPI, myocardial perfusion imaging; PET, positron emission tomography; CAD, coronary artery disease.

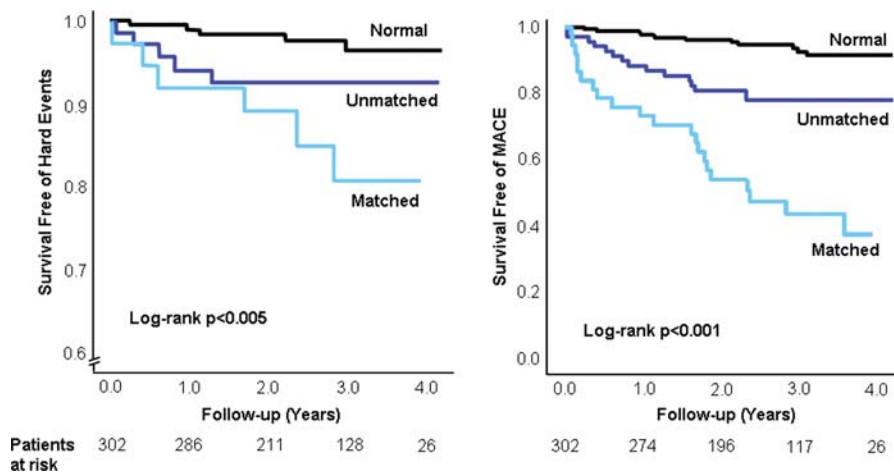

**Figure 3** The Kaplan–Meier survival curves showing the prognostic value of cardiac hybrid imaging. Cardiac hybrid findings predict (A) all-cause death or non-fatal myocardial infarction and (B) major adverse cardiac events (death, myocardial infarction, unstable angina requiring hospitalization, and coronary revascularization). Event rates are higher in the presence of matched findings (i.e. spatial superposition of perfusion defect and stenotic coronary arteries) compared with unmatched or normal findings. Reproduced with permission of Oxford University Press from Pazhenkottil et al.<sup>50</sup>

In clinical practice, a sequential diagnostic approach is often applied, with additional scans performed only if the results of the initial modality are equivocal. For example, the haemodynamic severity of intermediate stenosis in CT angiography can be confirmed by immediate perfusion imaging or the culprit lesion responsible for perfusion defect can be localized by CT angiography. If a sequential approach is used, the order of the scans depends also on the pre-test likelihood. It is rational to suggest that patients with low-to-moderate pre-test likelihood of CAD should start with CTCA and MPI would be performed only in those patients with obstructive CAD in CTCA. This can be justified by very high NPV of CTCA. On the other hand, if the likelihood of CAD is higher, larger fraction of the patients will have obstructive disease and starting with perfusion imaging would make sense. CTCA would be needed only if anatomical information is needed over a positive perfusion result. Naturally, both of these approaches have specific limitations. In the first

option, knowledge of coronary function or microvascular disease is missed. In the second option, preclinical atherosclerotic disease is not detected.

One of the major strengths of hybrid imaging is that it powerfully guides the selection of the most appropriate treatment strategy (medical conservative vs. percutaneous vs. surgical revascularization). An observational study indicated that indeed, the finding of flow-limiting coronary stenosis by non-invasive hybrid imaging had impact on the frequency of subsequent revascularization.<sup>51</sup> However, further studies are needed to evaluate whether the imaging-guided use of interventions will also influence clinical outcome of patients.

## Critical issues of hybrid imaging

It is obvious that putting together two modalities instead of single one creates specific challenges. The increased costs and potentially

radiation exposure from hybrid imaging procedures have also raised concerns on the appropriate use of hybrid imaging. It is currently assumed that a linear relationship exists between radiation dose and radiation-induced cancer risk. Obviously, all efforts should be made to reduce individual exposure to the lowest acceptable level.<sup>54</sup> Thus, over the last years, devices and acquisition protocols for CTCA and MPI have undergone significant modifications in order to comply with this principle.

Myocardial perfusion SPECT using <sup>99m</sup>Tc-based perfusion tracers allows to perform a full 1-day stress/rest study with a radiation dose of approximately 11.3 mSv, which is considerably lower than with <sup>201</sup>Thallium. However, introduction of novel dedicated small footprint cardiac scanners equipped with solid-state detectors based on the cadmium–zinc–telluride alloy that provides higher count statistics and improved energy resolution may allow further reductions in radiation exposure.<sup>55</sup> Duvall *et al.* have documented the feasibility and high diagnostic quality of half-dose 1-day stress/rest SPECT MPI with a total radiation dose of 5.8 mSv.<sup>56</sup> In addition, the linear count rate response of semiconductor detectors may allow low-dose-low-dose 1-day SPECT studies using count subtraction from sequential scanning.<sup>57</sup> Moreover, some of the currently used cyclotron-dependent perfusion tracers for PET imaging (i.e. <sup>15</sup>O-H<sub>2</sub>O and <sup>13</sup>N-NH<sub>3</sub>) are associated with even lower radiation doses and therefore may be particularly suitable for hybrid imaging (Table 3).<sup>41,45</sup>

The last years have witnessed tremendous reductions in radiation dose from CTCA through improvements in image acquisition protocols, particularly the introduction of electrocardiogram (ECG)-driven tube current modulation, body mass index-adapted tube voltage modulation, and prospective ECG-triggered sequential scanning.<sup>58,59</sup> The most recent high-pitch scanning protocols using dual-source CT scanners have lowered doses even further into the sub-milli-Sievert range (Table 3).<sup>60</sup>

The use of lower radiation protocols may promote the clinical use of cardiac hybrid imaging. In fact, a recent hybrid study reported a cumulative radiation exposure of 5.4 mSv for a hybrid stress-only SPECT/CTCA study which is well within the range of invasive diagnostic angiography (Table 3).<sup>61</sup>

## Future perspectives

In the last 10 years, cardiac hybrid imaging has advanced from a curiosity created by a group of ‘image tinkerers’ to a useful tool that is finding increasing clinical acceptance. The success of combining nuclear techniques (i.e. myocardial perfusion PET and SPECT) with CTCA was built on the impressive example that whole-body PET/CT has set in oncology. Nevertheless, other techniques such as CMR are accessible for hybrid imaging and may have distinct advantages. While CMR has been envisaged as a partner modality of hybrid imaging due to the lack of ionizing radiation, one important impediment was the fact that perfusion data could only be obtained in three cross-section of the left ventricle, which is insufficient to extrapolate onto a 3D volume. However, novel fast perfusion sequences (*kt*-SENSE) are now available that allow to obtain full-coverage volumetric perfusion data of the left ventricle and permit simple fusion with 3D volume-rendered CTCA into hybrid images (Figure 4).<sup>62</sup> Another possibility available

**Table 3** Estimated effective radiation dose from cardiac diagnostic imaging

| Protocol                                                                  | Injected activity (MBq) <sup>a</sup> | Effective dose (mSv) |
|---------------------------------------------------------------------------|--------------------------------------|----------------------|
| <sup>201</sup> Tl stress/redistribution                                   | 130                                  | 22.0                 |
| <sup>99m</sup> Tc sestamibi 1-day stress/rest                             | 350/1000                             | 11.3                 |
| <sup>99m</sup> Tc sestamibi half-dose CZT 1-day rest/stress <sup>56</sup> | 185/555                              | 5.8                  |
| <sup>82</sup> Rb stress/rest <sup>71</sup>                                | 1850/1850                            | 4.6                  |
| <sup>13</sup> N-NH <sub>3</sub> stress/rest                               | 550/550                              | 2.4                  |
| <sup>15</sup> O-H <sub>2</sub> O stress/rest                              | 1100/1100                            | 2.5                  |
| <sup>18</sup> F-fluorodeoxyglucose (viability)                            | 350                                  | 7.0                  |
| 64-slice CTCA (without tube current modulation)                           |                                      | 8.0–21.4             |
| 64-slice CTCA (with tube current modulation)                              |                                      | 7.0–14.0             |
| 64-slice CTCA (prospective ECG-triggering) <sup>59</sup>                  |                                      | 2.1                  |
| 320-slice CTCA (prospective ECG-triggering) <sup>72</sup>                 |                                      | 6.8                  |
| 2 × 128-slice (dual source), high-pitch spiral-CTCA <sup>60</sup>         |                                      | 0.9                  |
| Diagnostic coronary angiography                                           |                                      | 2.3–22.7             |

Adapted from Einstein *et al.*<sup>73</sup> CZT, cadmium–zinc–telluride; CTCA, CT coronary angiography; ECG, electrocardiogram.

<sup>a</sup>Effective radiation doses are estimated using ICRP publication 60 tissue weighting factors.<sup>74</sup>

already today is the combined systems with CMR and PET. Since CMR does not currently allow robust coronary angiography, the applications are likely elsewhere than in CAD. The experience is currently limited only to case reports, but based on the knowledge about the stand-alone techniques, one could expect that this combination would be very powerful in viability imaging and in various inflammatory cardiac diseases such as cardiac sarcoidosis and potentially in heart failure where PET and CMR can provide complementary information.

One interesting approach consists of the fusion of morphological information from CTCA with colour-coded CTCA-derived FFR (FFR<sub>CT</sub>) values. The method calculates FFR from patient-specific CCTA data using computational fluid dynamics during rest and simulated maximal coronary hyperaemia.<sup>63</sup> Preliminary results in patients suggest that non-invasive FFR<sub>CT</sub> may be useful to assess the haemodynamic significance of coronary lesions. These findings need to be confirmed in larger trials. Naturally, if CT could be used to image myocardial perfusion accurately, the obvious ‘hybrid’ imaging of choice would be combining CTCA and CT perfusion.

While traditional imaging is based on the detection of changes in the anatomy and physiological features, such as blood flow or contractile function, cardiovascular molecular imaging aims at visualization and measurement of biological processes at the molecular and cellular levels. Molecular imaging has provided techniques and new targeted probes to better understand the pathophysiological mechanism underlying cardiovascular diseases.<sup>64,65</sup> Examples of clinical

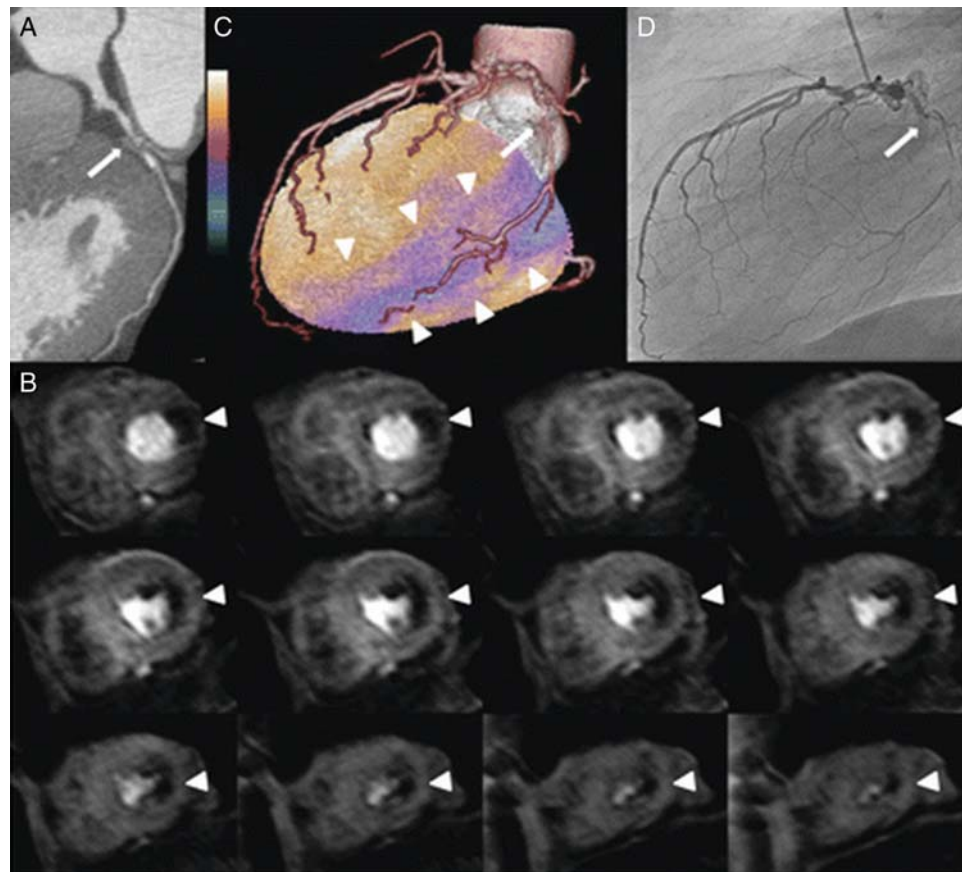

**Figure 4** The hybrid images can also be created by fusion of images from coronary computed tomographic angiography and cardiac magnetic resonance. A 65-year-old male patient with typical chest pain underwent low-dose coronary computed tomographic angiography for evaluation of coronary artery disease. (A) On CT angiography a high grade stenosis of the first large obtuse marginal branch (OM1) could be seen. Subsequently, a stress cardiac magnetic resonance perfusion imaging (adenosine 140  $\mu\text{g}/\text{kg}/\text{min}$ , 0.1 mmol/kg Gadobutrolum, kt-SENSE) was performed with a new sequence allowing three-dimensional perfusion assessment. This revealed a lateral perfusion defect, involving 13% of the left ventricular myocardium (B, white arrowheads). The three-dimensional hybrid images showed a perfect match of the perfusion defect (white arrowheads) and the culprit lesion (white arrow) (C), documenting a prognostically important finding requiring revascularization. A 50% stenosis of the proximal left anterior descending artery was not associated with any perfusion defect on three-dimensional hybrid. Finally, the patient underwent invasive coronary angiography confirming a subtotal occlusion of the OM1 (D, white arrow) which was successfully revascularized. On clinical follow-up, the patient was well and reported no further anginal episodes (adapted with permission from Manka et al.<sup>62</sup>).

problems that might benefit from molecular imaging include the identification of vulnerable atherosclerotic plaques before rupture and subsequent MI,<sup>66,67</sup> detection of biomechanisms that precede left ventricular remodelling and development of heart failure,<sup>68</sup> and the assessment of risk of ventricular arrhythmias by neuronal imaging.<sup>69</sup> Additionally, molecular imaging has great potential to facilitate the discovery and development of novel therapies through improved target identification and implementation of more efficient endpoints. Owing to high sensitivity and availability of tracers with low risk of toxicity, PET is the leading imaging technique to proceed with translation of molecular imaging into clinical trials.<sup>64,70</sup> Molecular imaging depends on hybrid imaging approaches, where the nuclear imaging component is used for molecular targeting seen as 'hot spot' and the CT or other anatomical imaging

modality is used for localization of the molecular signal. For example, hybrid PET and CT or MR scanners offer the possibility to integrate targeted PET images with high-resolution morphological images provided by CT or MR to obtain an anatomic distribution of the probe and account for partial volume errors that would cause underestimation of the true regional radiotracer activity.

## Conclusions

Cardiac hybrid imaging is entering into routine clinical use. The combination of morphological imaging of coronary arteries using multidetector CT angiography and functional imaging of myocardial perfusion using PET, SPECT, and recently also CMR is a very powerful non-invasive imaging method that provides



comprehensive information both for diagnosis and decision-making for the treatment of CAD. While the performance of hybrid imaging appears to outweigh stand-alone methods, more studies are warranted to demonstrate the cost effectiveness of this technique. The new PET/CMR systems and specific molecular imaging probes provide novel applications which are also likely to enter into clinical cardiology during the following years.

## Funding

The authors acknowledge financial support from The Academy of Finland Centre of Excellence in Molecular Imaging in Cardiovascular and Metabolic Research, Helsinki, Finland, and The Turku Collegium for Science and Medicine of University of Turku, Turku, Finland.

**Conflict of interest:** none declared.

## References

- Gould KL, Johnson NP. Coronary artery disease: percent stenosis in CAD—a flaw in current practice. *Nat Rev Cardiol* 2010;**7**:482–4.
- Uren NG, Melin JA, De Bruyne B, Wijns W, Baudhuin T, Camici PG. Relation between myocardial blood flow and the severity of coronary-artery stenosis. *N Engl J Med* 1994;**330**:1782–8.
- White CW, Wright CB, Doty DB, Hiratza LF, Eastham CL, Harrison DG *et al*. Does visual interpretation of the coronary arteriogram predict the physiologic importance of a coronary stenosis? *N Engl J Med* 1984;**310**:819–24.
- Tonino PA, Fearon WF, De Bruyne B, Oldroyd KG, Leesar MA, Ver Lee PN *et al*. Angiographic versus functional severity of coronary artery stenoses in the FAME study fractional flow reserve versus angiography in multivessel evaluation. *J Am Coll Cardiol* 2010;**55**:2816–21.
- Hacker M, Jakobs T, Hack N, Nikolaou K, Becker C, von Ziegler F *et al*. Sixty-four slice spiral CT angiography does not predict the functional relevance of coronary artery stenoses in patients with stable angina. *Eur J Nucl Med Mol Imaging* 2007;**34**:4–10.
- Gaemperli O, Schepis T, Koepfli P, Valenta I, Soyka J, Leschka S *et al*. Accuracy of 64-slice CT angiography for the detection of functionally relevant coronary stenoses as assessed with myocardial perfusion SPECT. *Eur J Nucl Med Mol Imaging* 2007;**34**:1162–71.
- Gaemperli O, Schepis T, Valenta I, Koepfli P, Husmann L, Scheffel H *et al*. Functionally relevant coronary artery disease: comparison of 64-section CT angiography with myocardial perfusion SPECT. *Radiology* 2008;**248**:414–23.
- Schuijff JD, Wijns W, Jukema JW, Atsma DE, de Roos A, Lamb HJ *et al*. Relationship between noninvasive coronary angiography with multi-slice computed tomography and myocardial perfusion imaging. *J Am Coll Cardiol* 2006;**48**:2508–14.
- Boden WE, O'Rourke RA, Teo KK, Hartigan PM, Maron DJ, Kostuk WJ *et al*. Optimal medical therapy with or without PCI for stable coronary disease. *N Engl J Med* 2007;**356**:1503–16.
- Frye RL, August P, Brooks MM, Hardison RM, Kelsey SF, MacGregor JM *et al*. A randomized trial of therapies for type 2 diabetes and coronary artery disease. *N Engl J Med* 2009;**360**:2503–15.
- Hachamovitch R, Hayes SW, Friedman JD, Cohen I, Berman DS. Comparison of the short-term survival benefit associated with revascularization compared with medical therapy in patients with no prior coronary artery disease undergoing stress myocardial perfusion single photon emission computed tomography. *Circulation* 2003;**107**:2900–7.
- Shaw LJ, Berman DS, Maron DJ, Mancini GB, Hayes SW, Hartigan PM *et al*. Optimal medical therapy with or without percutaneous coronary intervention to reduce ischemic burden: results from the Clinical Outcomes Utilizing Revascularization and Aggressive Drug Evaluation (COURAGE) trial nuclear substudy. *Circulation* 2008;**117**:1283–91.
- Pijls NH, Fearon WF, Tonino PA, Siebert U, Ikeno F, Bornschein B *et al*. Fractional flow reserve versus angiography for guiding percutaneous coronary intervention in patients with multivessel coronary artery disease: 2-year follow-up of the FAME (Fractional Flow Reserve Versus Angiography for Multivessel Evaluation) study. *J Am Coll Cardiol* 2010;**56**:177–84.
- Tonino PA, De Bruyne B, Pijls NH, Siebert U, Ikeno F, van't Veer M *et al*. Fractional flow reserve versus angiography for guiding percutaneous coronary intervention. *N Engl J Med* 2009;**360**:213–24.
- Wijns W, Kolh P, Danchin N, Di Mario C, Falk V, Folliguet T *et al*. Guidelines on myocardial revascularization: The Task Force on Myocardial Revascularization of the European Society of Cardiology (ESC) and the European Association for Cardio-Thoracic Surgery (EACTS). *Eur Heart J* 2010;**31**:2501–55.
- Gaemperli O, Schepis T, Kalf V, Namdar M, Valenta I, Stefani L *et al*. Validation of a new cardiac image fusion software for three-dimensional integration of myocardial perfusion SPECT and stand-alone 64-slice CT angiography. *Eur J Nucl Med Mol Imaging* 2007;**34**:1097–106.
- Koepfli P, Hany TF, Wyss CA, Namdar M, Burger C, Constantinidis AV *et al*. CT attenuation correction for myocardial perfusion quantification using a PET/CT hybrid scanner. *J Nucl Med* 2004;**45**:537–42.
- Gaemperli O, Bengel FM, Kaufmann PA. Cardiac hybrid imaging. *Eur Heart J* 2011;**32**:2100–8.
- Kaufmann PA, Gaemperli O. Hybrid cardiac imaging. In: Zaret BL, Beller GA, eds. *Clinical Nuclear Cardiology—State of the Art and Future Directions*. 4th ed. Philadelphia, PA: Mosby Elsevier; 2010.
- Schroeder S, Achenbach S, Bengel F, Burgstahler C, Cademartini F, de Feyter P *et al*. Working Group Nuclear Cardiology and Cardiac CT; European Society of Cardiology; European Council of Nuclear Cardiology. Cardiac computed tomography: indications, applications, limitations, and training requirements: report of a Writing Group deployed by the Working Group Nuclear Cardiology and Cardiac CT of the European Society of Cardiology and the European Council of Nuclear Cardiology. *Eur Heart J* 2008;**29**:531–56.
- Meijboom WB, Meijs MF, Schuijff JD, Cramer MJ, Mollet NR, van Mieghem CA *et al*. Diagnostic accuracy of 64-slice computed tomography coronary angiography: a prospective, multicenter, multivendor study. *J Am Coll Cardiol* 2008;**52**:2135–44.
- Miller JM, Rochitte CE, Dewey M, Arbab-Zadeh A, Niinuma H, Gottlieb I *et al*. Diagnostic performance of coronary angiography by 64-row CT. *N Engl J Med* 2008;**359**:2324–36.
- Budoff MJ, Dowe D, Jollis JG, Gitter M, Sutherland J, Halamert E *et al*. Diagnostic performance of 64-multidetector row coronary computed tomographic angiography for evaluation of coronary artery stenosis in individuals without known coronary artery disease: results from the prospective multicenter ACCURACY (Assessment by Coronary Computed Tomographic Angiography of Individuals Undergoing Invasive Coronary Angiography) trial. *J Am Coll Cardiol* 2008;**52**:1724–32.
- Karamitsos TD, Dall'Armellina E, Choudhury RP, Neubauer S. Ischemic heart disease: comprehensive evaluation by cardiovascular magnetic resonance. *Am Heart J* 2011;**162**:16–30.
- Saraste A, Nekolla S, Schwaiger M. Contrast-enhanced magnetic resonance imaging in the assessment of myocardial infarction and viability. *J Nucl Cardiol* 2008;**15**:105–17.
- Büscher K, Judenhofer MS, Kuhlmann MT, Hermann S, Wehr HF, Schäfers KP *et al*. Isochronous assessment of cardiac metabolism and function in mice using hybrid PET/MRI. *J Nucl Med* 2010;**51**:1277–84.
- Nekolla SG, Martinez-Moeller A, Saraste A. PET and MRI in cardiac imaging: from validation studies to integrated applications. *Eur J Nucl Med Mol Imaging* 2009;**36**:S121–30.
- Klocke FJ, Baird MG, Lorell BH, Bateman TM, Messer JV, Berman DS *et al*. ACC/AHA/ASNC guidelines for the clinical use of cardiac radionuclide imaging—executive summary: a report of the American College of Cardiology/American Heart Association Task Force on Practice Guidelines (ACC/AHA/ASNC Committee to Revise the 1995 Guidelines for the Clinical Use of Cardiac Radionuclide Imaging). *J Am Coll Cardiol* 2003;**42**:1318–33.
- Underwood SR, Anagnostopoulos C, Cerqueira M, Ell PJ, Flint EJ, Harbinson M *et al*. Myocardial perfusion scintigraphy: the evidence. *Eur J Nucl Med Mol Imaging* 2004;**31**:261–91.
- Hachamovitch R, Berman DS, Shaw LJ, Kiat H, Cohen I, Cabico JA *et al*. Incremental prognostic value of myocardial perfusion single photon emission computed tomography for the prediction of cardiac death: differential stratification for risk of cardiac death and myocardial infarction. *Circulation* 1998;**97**:535–43.
- Di Carli MF, Hachamovitch R. New technology for noninvasive evaluation of coronary artery disease. *Circulation* 2007;**115**:1464–80.
- Knuuti J, Kajander S, Maki M, Ukkonen H. Quantification of myocardial blood flow will reform the detection of cad. *J Nucl Cardiol* 2009;**16**:497–506.
- Bergmann SR, Fox KA, Rand AL, McElvany KD, Welch MJ, Markham J *et al*. Quantification of regional myocardial blood flow in vivo with H<sub>2</sub><sup>15</sup>O. *Circulation* 1984;**70**:724–33.
- Hutchins GD, Schwaiger M, Rosenspire KC, Krivokapich J, Schelbert H, Kuhl DE. Noninvasive quantification of regional blood flow in the human heart using N-13 ammonia and dynamic positron emission tomographic imaging. *J Am Coll Cardiol* 1990;**15**:1032–42.
- Kajander SA, Joutsiniemi E, Saraste M, Pietilä M, Ukkonen H, Saraste A *et al*. Clinical value of absolute quantification of myocardial perfusion with <sup>15</sup>O-water in coronary artery disease. *Circ Cardiovasc Imaging* 2011 (Epub ahead of print).

36. Parkash R, de Kemp RA, Ruddy TD, Kitsikis A, Hart R, Beauchesne L et al. Potential utility of rubidium 82 pet quantification in patients with 3-vessel coronary artery disease. *J Nucl Cardiol* 2004;**11**:440–9.
37. Yoshinaga K, Katoh C, Noriyasu K, Iwado Y, Furuyama H, Ito Y et al. Reduction of coronary flow reserve in areas with and without ischemia on stress perfusion imaging in patients with coronary artery disease: a study using oxygen 15-labeled water pet. *J Nucl Cardiol* 2003;**10**:275–83.
38. Stone GW, Maehara A, Lansky AJ, de Bruyne B, Cristea E, Mintz GS et al. A prospective natural-history study of coronary atherosclerosis. *N Engl J Med* 2011;**364**:226–35.
39. Cerqueira MD, Weissman NJ, Dilsizian V, Jacobs AK, Kaul S, Laskey WK et al. Standardized myocardial segmentation and nomenclature for tomographic imaging of the heart: a statement for healthcare professionals from the Cardiac Imaging Committee of the Council on Clinical Cardiology of the American Heart Association. *Circulation* 2002;**105**:539–42.
40. Javadi MS, Lautamaki R, Merrill J, Voicu C, Epley W, McBride G et al. Definition of vascular territories on myocardial perfusion images by integration with true coronary anatomy: a hybrid PET/CT analysis. *J Nucl Med* 2010;**51**:198–203.
41. Namdar M, Hany TF, Koepfli P, Siegrist PT, Burger C, Wyss CA et al. Integrated PET/CT for the assessment of coronary artery disease: a feasibility study. *J Nucl Med* 2005;**46**:930–5.
42. Rispler S, Keidar Z, Ghersin E, Roguin A, Soil A, Dragu R et al. Integrated single-photon emission computed tomography and computed tomography coronary angiography for the assessment of hemodynamically significant coronary artery lesions. *J Am Coll Cardiol* 2007;**49**:1059–67.
43. Groves AM, Speechly-Dick ME, Kayani I, Pugliese F, Endozo R, McEwan J et al. First experience of combined cardiac PET/64-detector CT angiography with invasive angiographic validation. *Eur J Nucl Med Mol Imaging* 2009;**36**:2027–33.
44. Sato A, Nozato T, Hikita H, Miyazaki S, Takahashi Y, Kuwahara T et al. Incremental value of combining 64-slice computed tomography angiography with stress nuclear myocardial perfusion imaging to improve noninvasive detection of coronary artery disease. *J Nucl Cardiol* 2010;**17**:19–26.
45. Kajander S, Joutsiniemi E, Saraste M, Pietilä M, Ukkonen H, Saraste A et al. Cardiac positron emission tomography/computed tomography imaging accurately detects anatomically and functionally significant coronary artery disease. *Circulation* 2010;**122**:603–13.
46. Gaemperli O, Schepis T, Valenta I, Husmann L, Scheffel H, Duerst V et al. Cardiac image fusion from stand-alone SPECT and CT: clinical experience. *J Nucl Med* 2007;**48**:696–703.
47. Santana CA, Garcia EV, Faber TL, Sirineni GK, Esteves FP, Sanyal R et al. Diagnostic performance of fusion of myocardial perfusion imaging (MPI) and computed tomography coronary angiography. *J Nucl Cardiol* 2009;**16**:201–11.
48. Slomka PJ, Cheng VY, Dey D, Woo J, Ramesh A, Van Kriekinge S et al. Quantitative analysis of myocardial perfusion SPECT anatomically guided by coregistered 64-slice coronary CT angiography. *J Nucl Med* 2009;**50**:1621–30.
49. van Werkhoven JM, Schuijff JD, Gaemperli O, Jukema JW, Kroft LJ, Boersma E et al. Prognostic value of multislice computed tomography and gated single-photon emission computed tomography in patients with suspected coronary artery disease. *J Am Coll Cardiol* 2009;**53**:623–32.
50. Pazhenkottil AP, Nkoulou RN, Ghadri JR, Herzog BA, Buechel RR, Küest SM et al. Prognostic value of cardiac hybrid imaging integrating single-photon emission computed tomography with coronary computed tomography angiography. *Eur Heart J* 2011;**32**:1465–71.
51. Pazhenkottil AP, Nkoulou RN, Ghadri JR, Herzog BA, Küest SM, Husmann L et al. Impact of cardiac hybrid single-photon emission computed tomography/computed tomography imaging on choice of treatment strategy in coronary artery disease. *Eur Heart J* 2011.
52. Hachamovitch R, Johnson JR, Hlatky MA, Cantagallo L, Johnson BH, Coughlan M et al. The study of myocardial perfusion and coronary anatomy imaging roles in CAD (SPARC): design, rationale, and baseline patient characteristics of a prospective, multicenter observational registry comparing PET, SPECT, and CTA for resource utilization and clinical outcomes. *J Nucl Cardiol* 2009;**16**:935–48.
53. PROspective Multicenter Imaging Study for Evaluation of Chest Pain (PROMISE). Funded by the National Heart, Lung, and Blood Institute. <http://clinicaltrials.gov/show/NCT01174550>. (4 October 2010).
54. Fazel R, Krumholz HM, Wang Y, Ross JS, Chen J, Ting HH et al. Exposure to low-dose ionizing radiation from medical imaging procedures. *N Engl J Med* 2009;**361**:849–57.
55. Gaemperli O, Kaufmann PA. Lower dose and shorter acquisition: pushing the boundaries of myocardial perfusion SPECT. *J Nucl Cardiol* 2011;**18**:830–2.
56. Duvall WL, Croft LB, Ginsberg ES, Einstein AJ, Guma KA, George T et al. Reduced isotope dose and imaging time with a high-efficiency CZT SPECT camera. *J Nucl Cardiol* 2011;**18**:847–57.
57. Nkoulou R, Pazhenkottil AP, Kuest SM, Ghadri JR, Wolftrum M, Husmann L et al. Semiconductor detectors allow low-dose-low-dose 1-day SPECT myocardial perfusion imaging. *J Nucl Med* 2011;**52**:1204–9.
58. Hausleiter J, Martinoff S, Hadamitzky M, Martuscelli E, Pschierer I, Feuchtnner GM et al. Image quality and radiation exposure with a low tube voltage protocol for coronary CT angiography results of the PROTECTION II Trial. *JACC Cardiovasc Imaging* 2010;**3**:1113–23.
59. Husmann L, Valenta I, Gaemperli O, Adda O, Treyer V, Wyss CA et al. Feasibility of low-dose coronary CT angiography: first experience with prospective ECG-gating. *Eur Heart J* 2008;**29**:191–7.
60. Achenbach S, Marwan M, Ropers D, Schepis T, Pflederer T, Anders K et al. Coronary computed tomography angiography with a consistent dose below 1 mSv using prospectively electrocardiogram-triggered high-pitch spiral acquisition. *Eur Heart J* 2010;**31**:340–6.
61. Husmann L, Herzog BA, Gaemperli O, Tatsugami F, Burkhard N, Valenta I et al. Diagnostic accuracy of computed tomography coronary angiography and evaluation of stress-only single-photon emission computed tomography/computed tomography hybrid imaging: comparison of prospective electrocardiogram-triggering vs. retrospective gating. *Eur Heart J* 2009;**30**:600–7.
62. Manka R, Kuhn FP, Kuest SM, Gaemperli O, Kozzerke S, Kaufmann PA. Hybrid cardiac magnetic resonance/computed tomographic imaging: first fusion of three-dimensional magnetic resonance perfusion and low-dose coronary computed tomographic angiography. *Eur Heart J* 2011;**32**:2625.
63. Kim HJ, Vignon-Clementel IE, Coogan JS, Figueroa CA, Jansen KE, Taylor CA. Patient-specific modeling of blood flow and pressure in human coronary arteries. *Ann Biomed Eng* 2010;**38**:3195–209.
64. Saraste A, Nekolla SG, Schwaiger M. Cardiovascular molecular imaging: an overview. *Cardiovasc Res* 2009;**50**:1088–94.
65. Nahrendorf M, Sosnovik DE, French BA, Swirski FK, Bengel F, Sadeghi MM et al. Multimodality cardiovascular molecular imaging, Part II. *Circ Cardiovasc Imaging* 2009;**2**:56–70.
66. Rudd JH, Narula J, Strauss HW, Virmani R, Machac J, Klimas M et al. Imaging atherosclerotic plaque inflammation by fluorodeoxyglucose with positron emission tomography: ready for prime time? *J Am Coll Cardiol* 2010;**55**:2527–35.
67. Gaemperli O, Shalhoub J, Owen DR, Lamare F, Johansson S, Fouladi N et al. Imaging intraplaque inflammation in carotid atherosclerosis with 11C-PK11195 positron emission tomography/computed tomography. *Eur Heart J* 2011 September 19. [Epub ahead of print].
68. Kramer CM, Sinusas AJ, Sosnovik DE, French BA, Bengel FM. Multimodality imaging of myocardial injury and remodeling. *J Nucl Med* 2010;**51**:107–21S.
69. Jacobson AF, Senior R, Cerqueira MD, Wong ND, Thomas GS, Lopez VA et al. Myocardial iodine-123 meta-iodobenzylguanidine imaging and cardiac events in heart failure. Results of the prospective ADMIRE-HF (AdreView Myocardial Imaging for Risk Evaluation in Heart Failure) study. *J Am Coll Cardiol* 2010;**55**:2212–21.
70. Knuuti J, Bengel FM. Positron emission tomography and molecular imaging. *Heart* 2008;**94**:360–7.
71. Senthamizhchelvan S, Bravo PE, Esaias C, Lodge MA, Merrill J, Hobbs RF et al. Human biodistribution and radiation dosimetry of 82Rb. *J Nucl Med* 2010;**51**:1592–9.
72. Rybicki FJ, Otero HJ, Steigner ML, Vorobiof G, Nallamshetty L, Mitsouras D et al. Initial evaluation of coronary images from 320-detector row computed tomography. *Int J Cardiovasc Imaging* 2008;**24**:535–46.
73. Einstein AJ, Moser KW, Thompson RC, Cerqueira MD, Henzlova MJ. Radiation dose to patients from cardiac diagnostic imaging. *Circulation* 2007;**116**:1290–305.
74. 1990 Recommendations of the International Commission on Radiological Protection. ICRP Publication 60. *Ann ICRP* 1991;**21**:1–201.
